# Supplementary material
Source: Springer Nature journal article supplement (https://www.springermedizin.de/resource/supplementary/13063_2010_530_MOESM5_ESM.pdf/9618174)

Enrolment  
Allocation  
Baseline participation

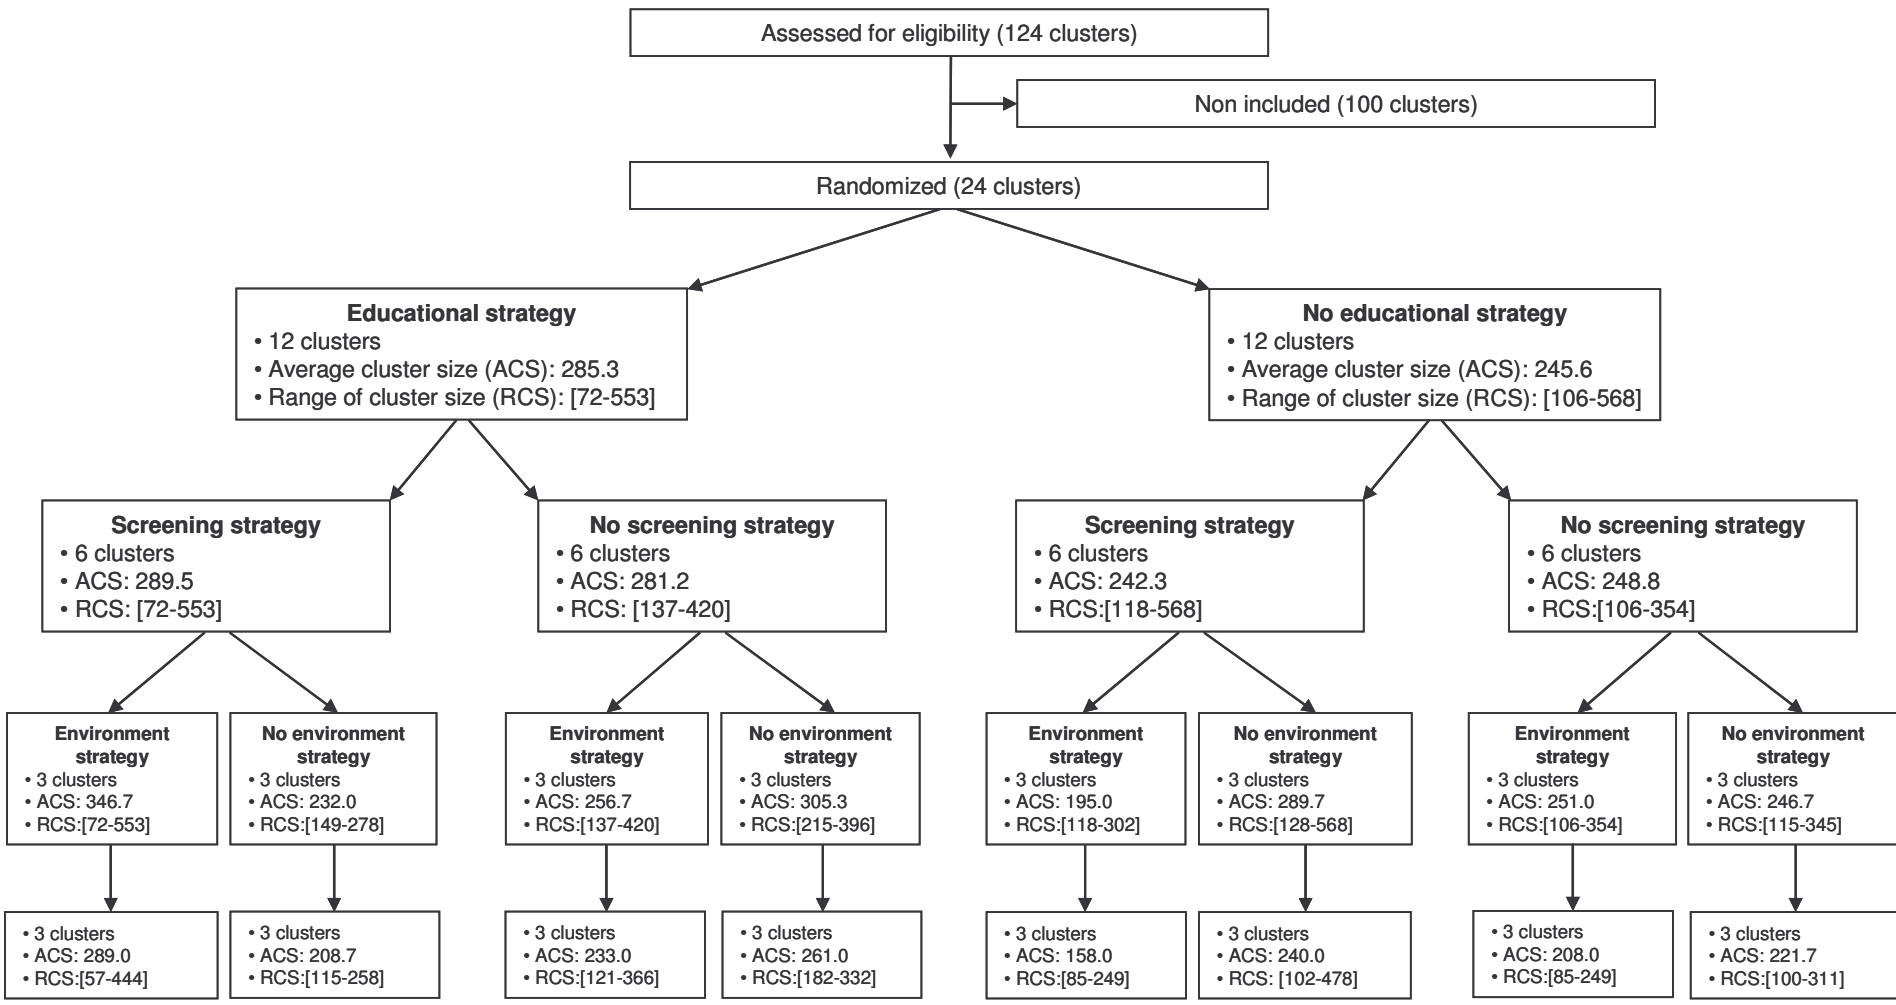

Supplement: MOESM5 [file 9618174]
